# Supplementary material
Source: PubMed Central journal article supplement (PMC4208311)
Supplement: NIHMS635397-supplement-supplement_1.pdf [file NIHMS635397-supplement-supplement_1.pdf]

# Supplementary Figure 1

**a**

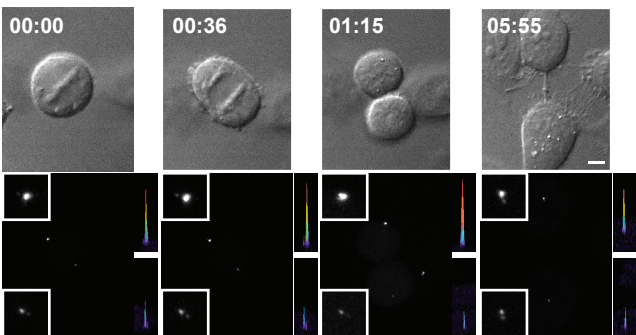

**b**

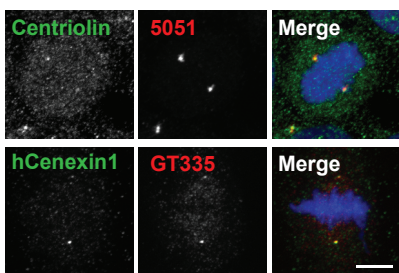

# Supplementary Figure 2

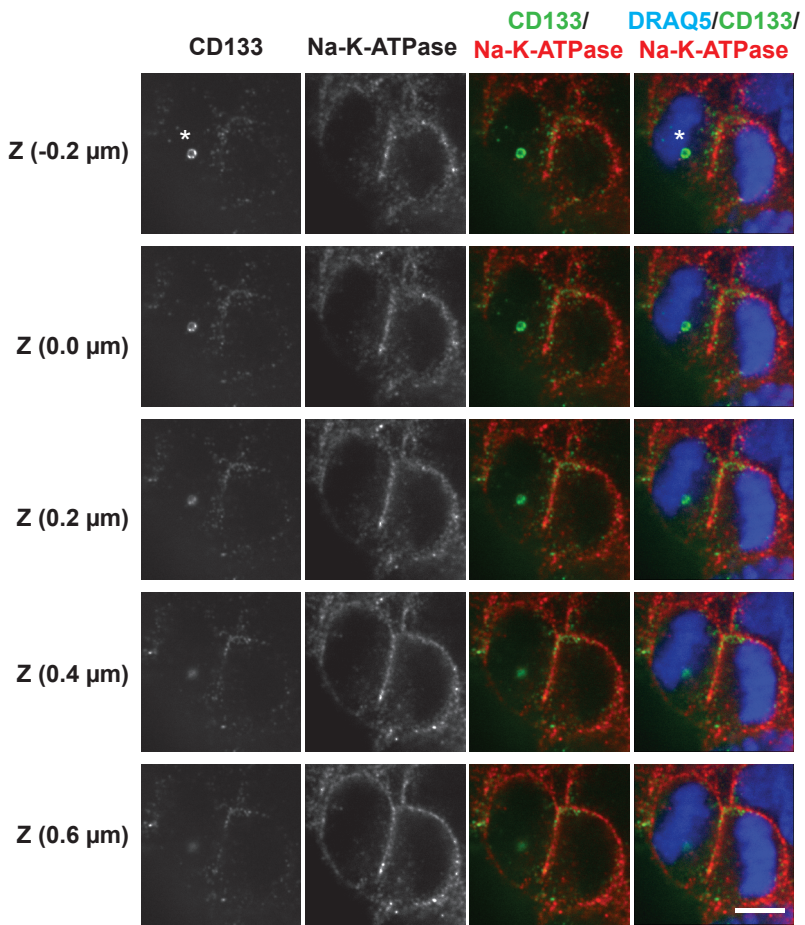

# Supplementary Figure 3

a

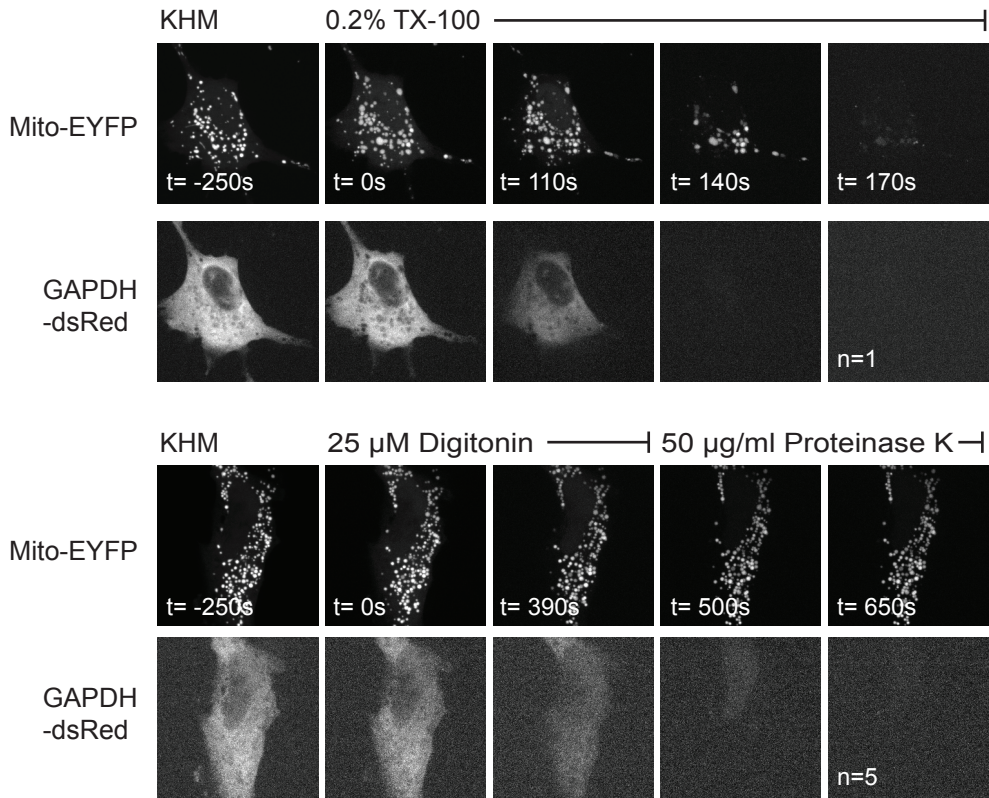

b

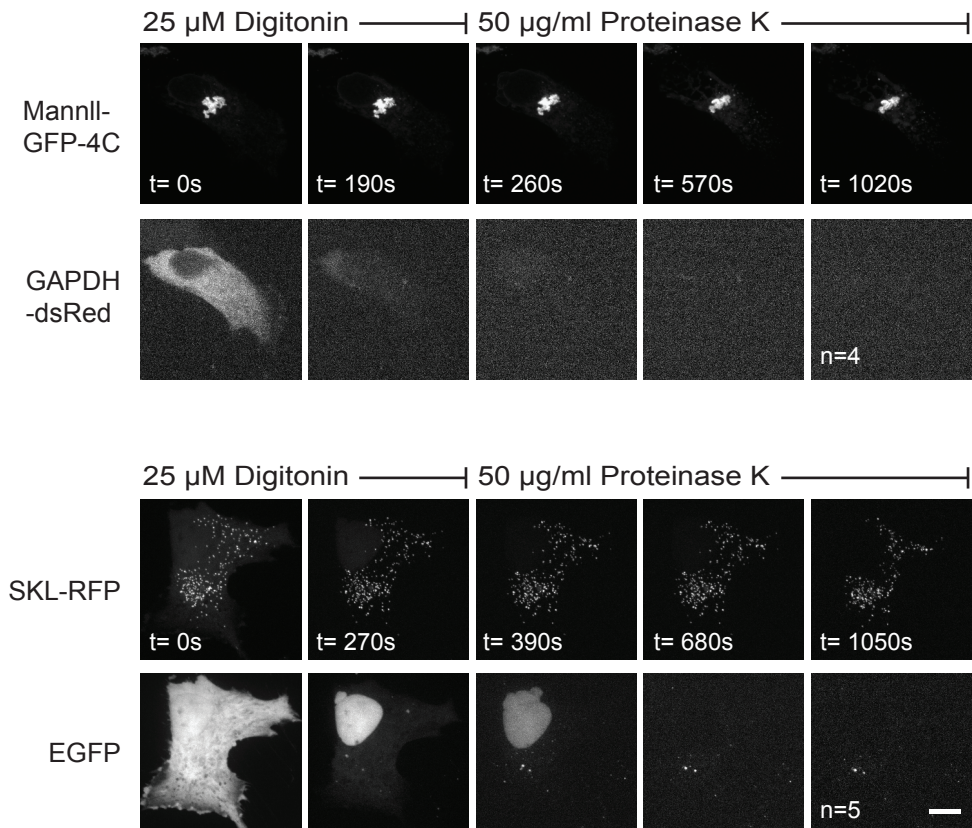

# Supplementary Figure 4

**a**

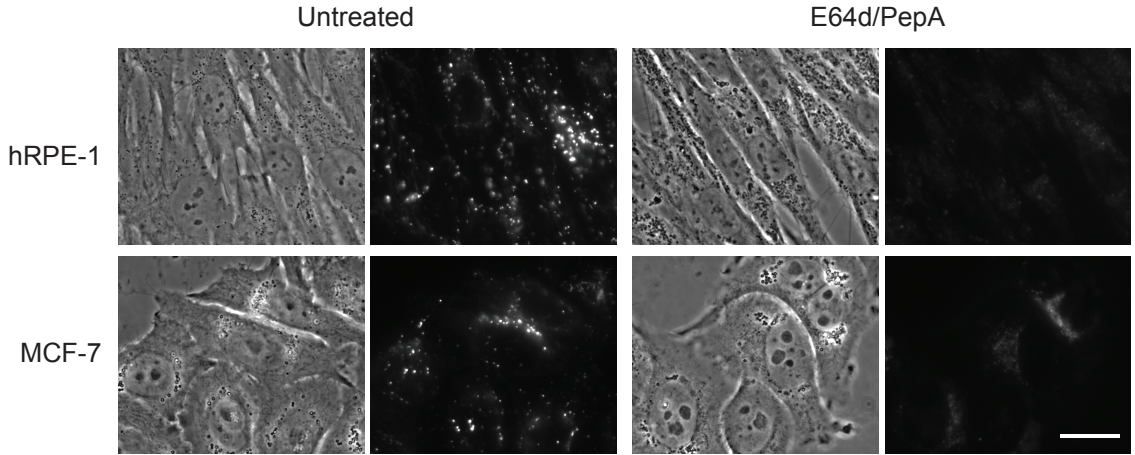

**b**

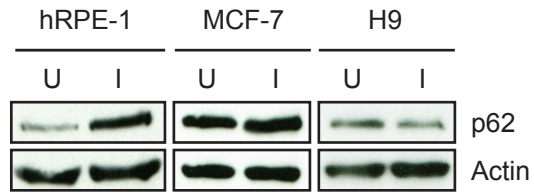

# Supplementary Figure 5

**a**

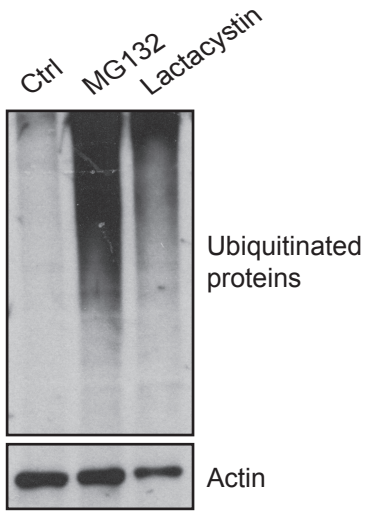

**b**

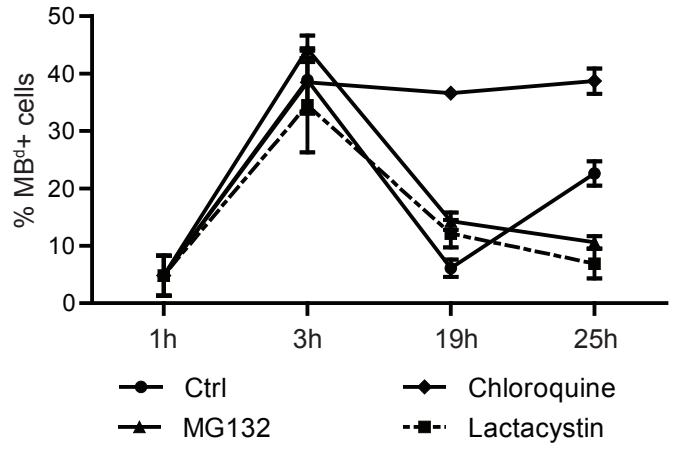

Supplementary Table 1: total iPSC colony number

**dH1f**

| experiment | 1   | 2   | 3   | 4  | 5  | 6  | 7   | 8   | 9   |
|------------|-----|-----|-----|----|----|----|-----|-----|-----|
| shNT       | 137 | 466 | 250 | 9  | 11 | 20 | 88  | 78  | 120 |
| shNBR1     | 242 | 708 | 703 | 56 | 96 | 91 | 160 | 280 | 210 |

**dH1f-continued**

| experiment | 10 | 11 | 12 | 13 | 14 | 15 |
|------------|----|----|----|----|----|----|
| shNT       | 21 | 27 | 24 | 39 | 47 | 27 |
| shNBR1     | 71 | 26 | 70 | 84 | 72 | 56 |

**IMR90**

| experiment | 1  | 2   | 3   |
|------------|----|-----|-----|
| shNT       | 14 | 49  | 125 |
| shNBR1     | 59 | 199 | 222 |

**hFib2**

| experiment | 1  | 2  | 3  | 4   | 5   | 6   |
|------------|----|----|----|-----|-----|-----|
| shNT       | 27 | 51 | 28 | 423 | 411 | 501 |
| shNBR1     | 39 | 64 | 69 | 662 | 771 | 656 |
